# Supplementary material for: Tonic suppression of PCAT29 by the IL-6 signaling pathway in prostate cancer: Reversal by resveratrol
Source: PubMed Central journal article supplement (PMC5415196; doi:10.1371/journal.pone.0177198), 2017-05-03

Uncut and unedited image of the blot used in Figure 3A.

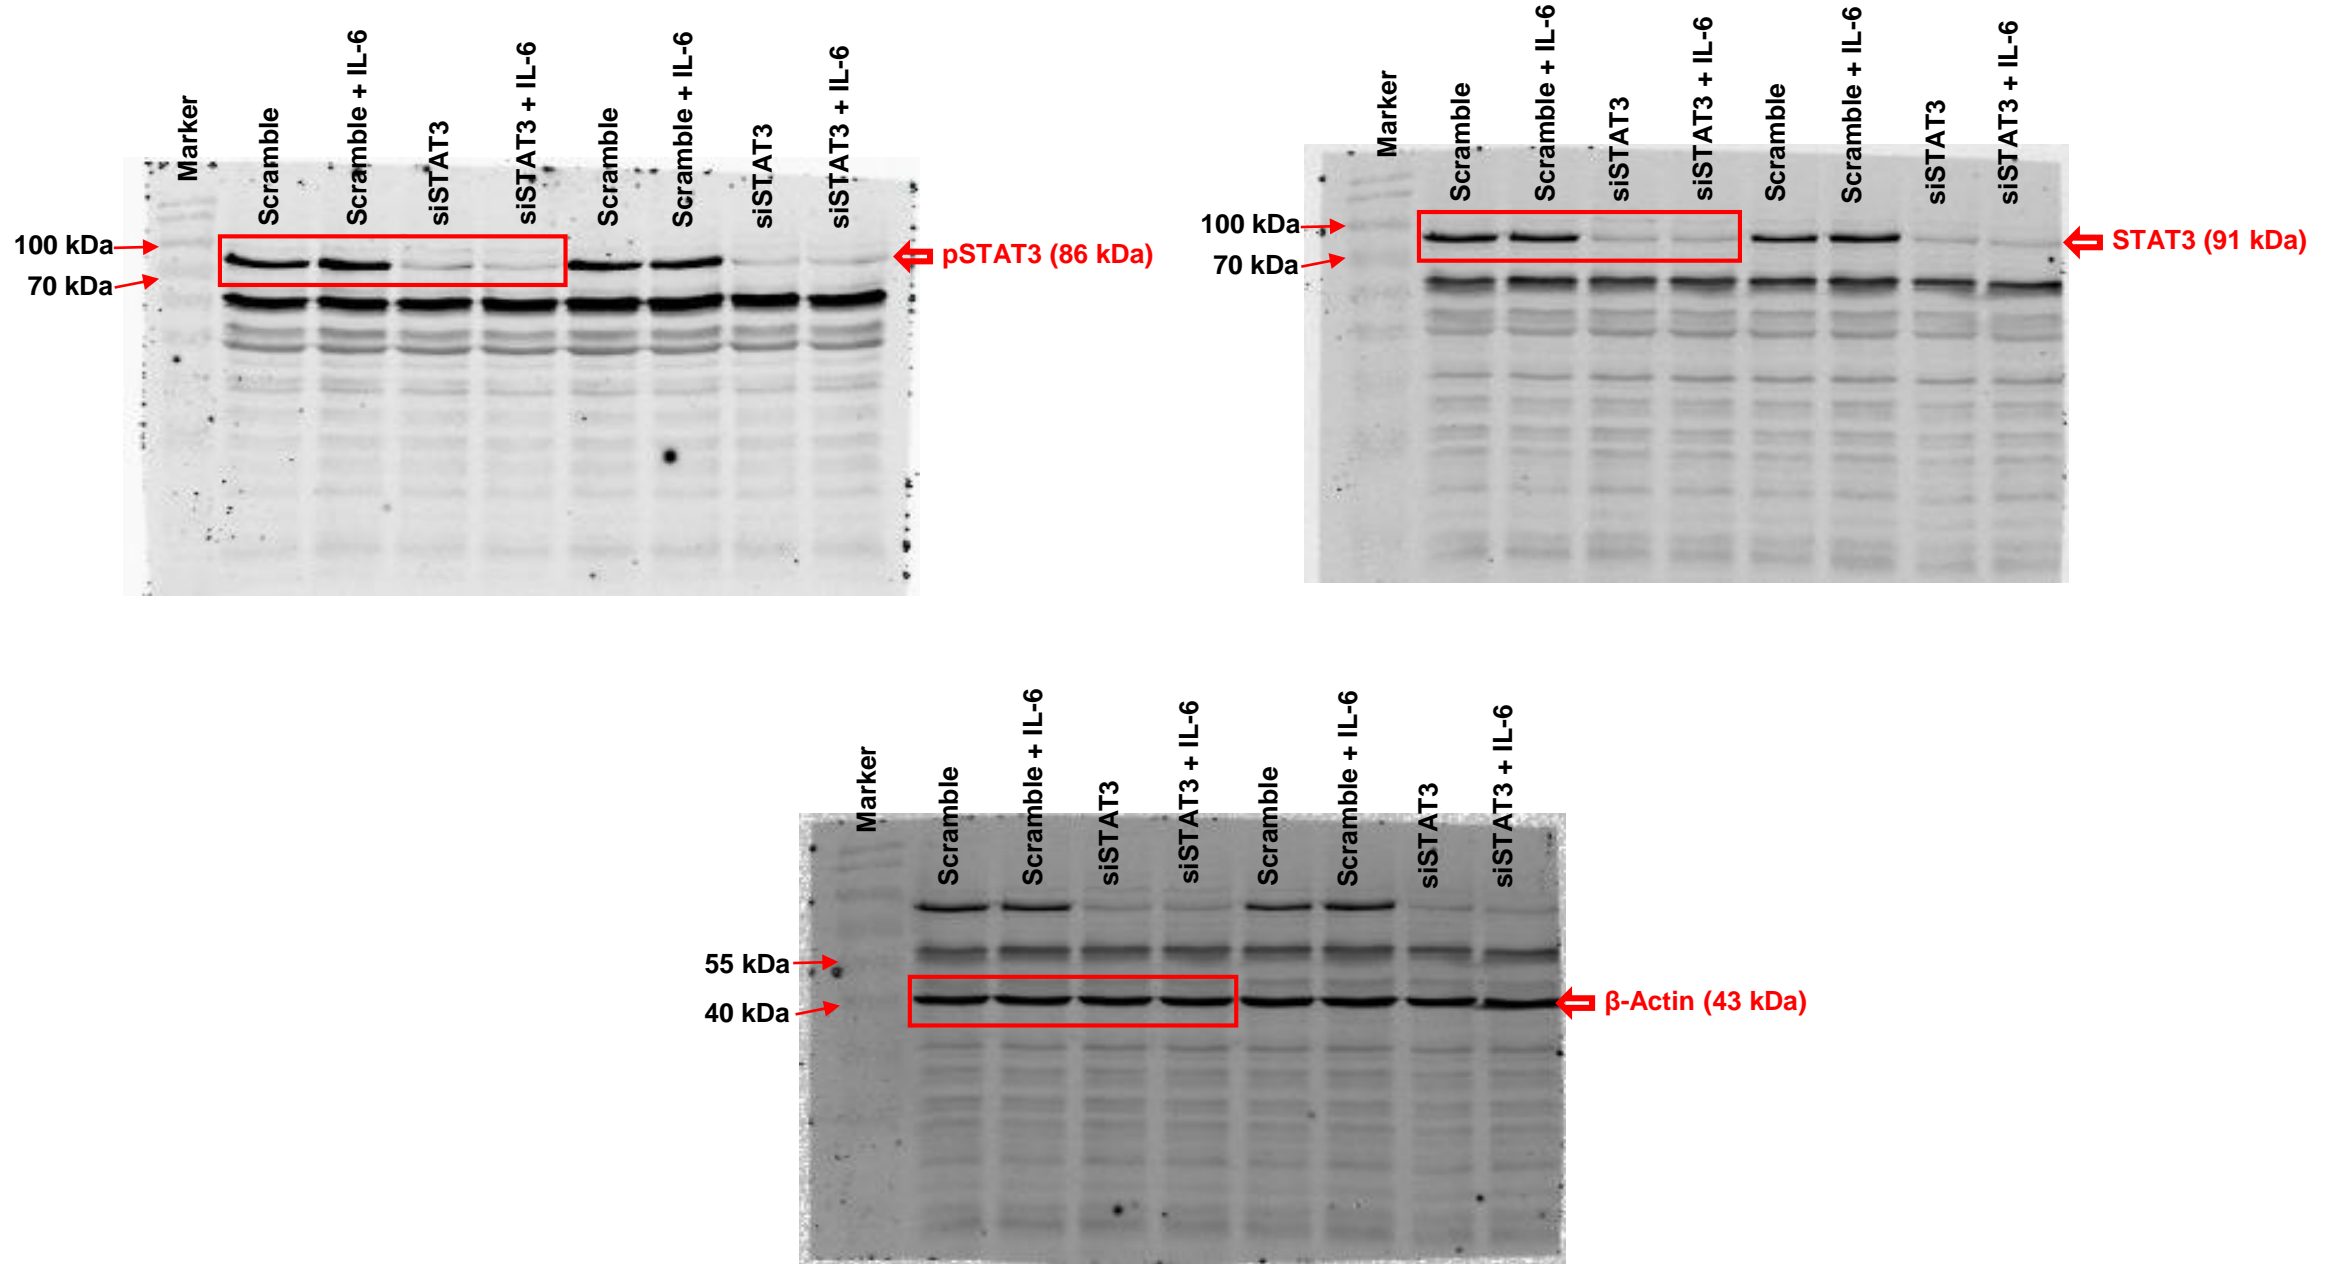

# Uncut and unedited image of the blot used in Figure 3B

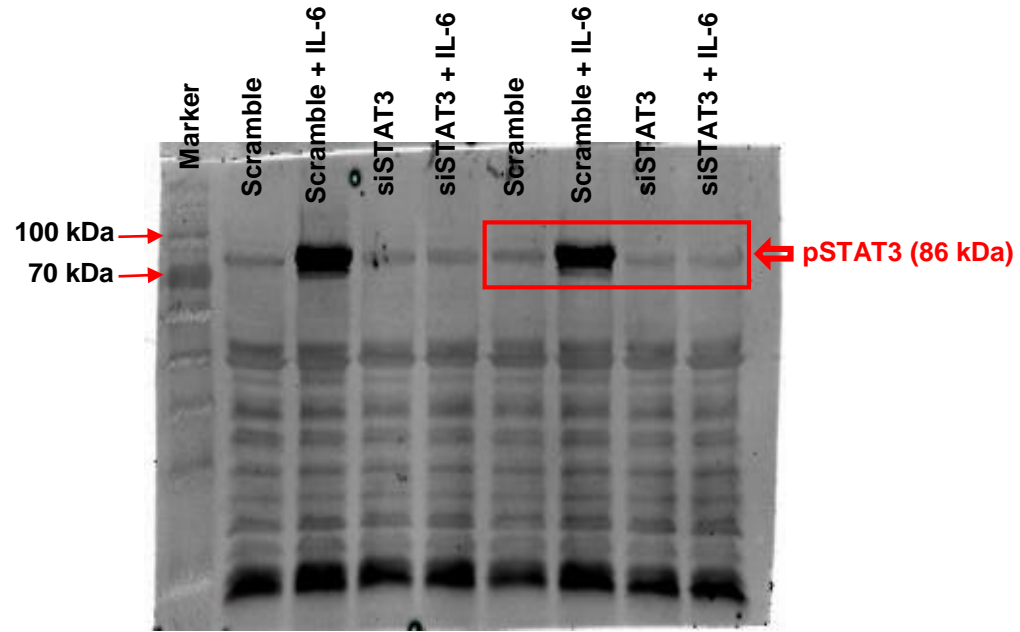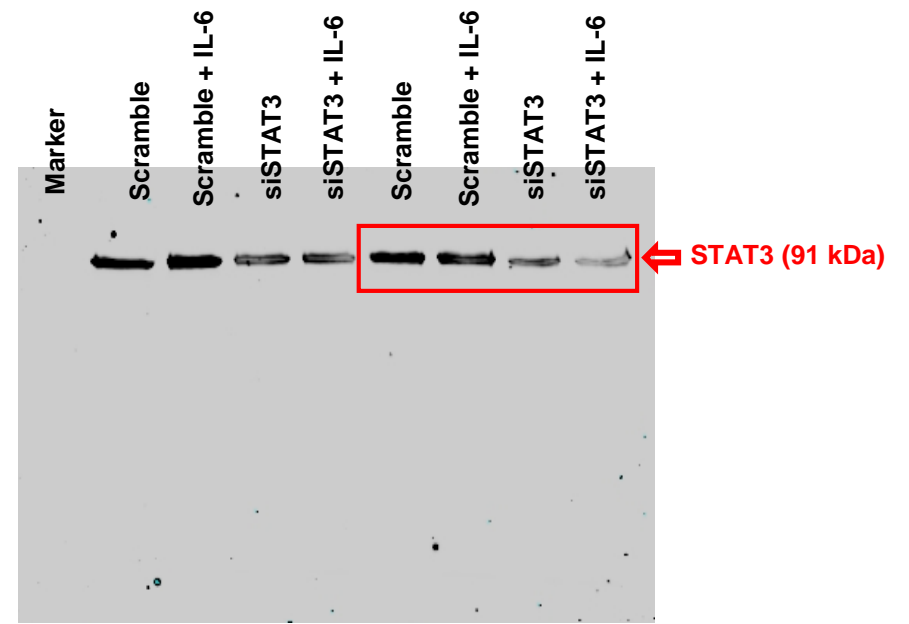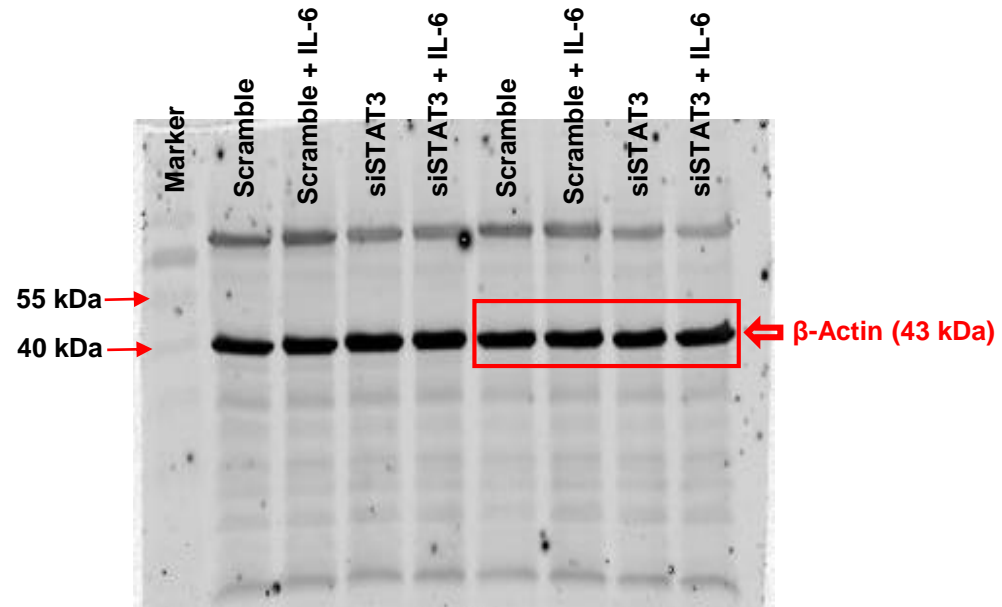

Uncut and unedited image of the blot used in Figure 3C

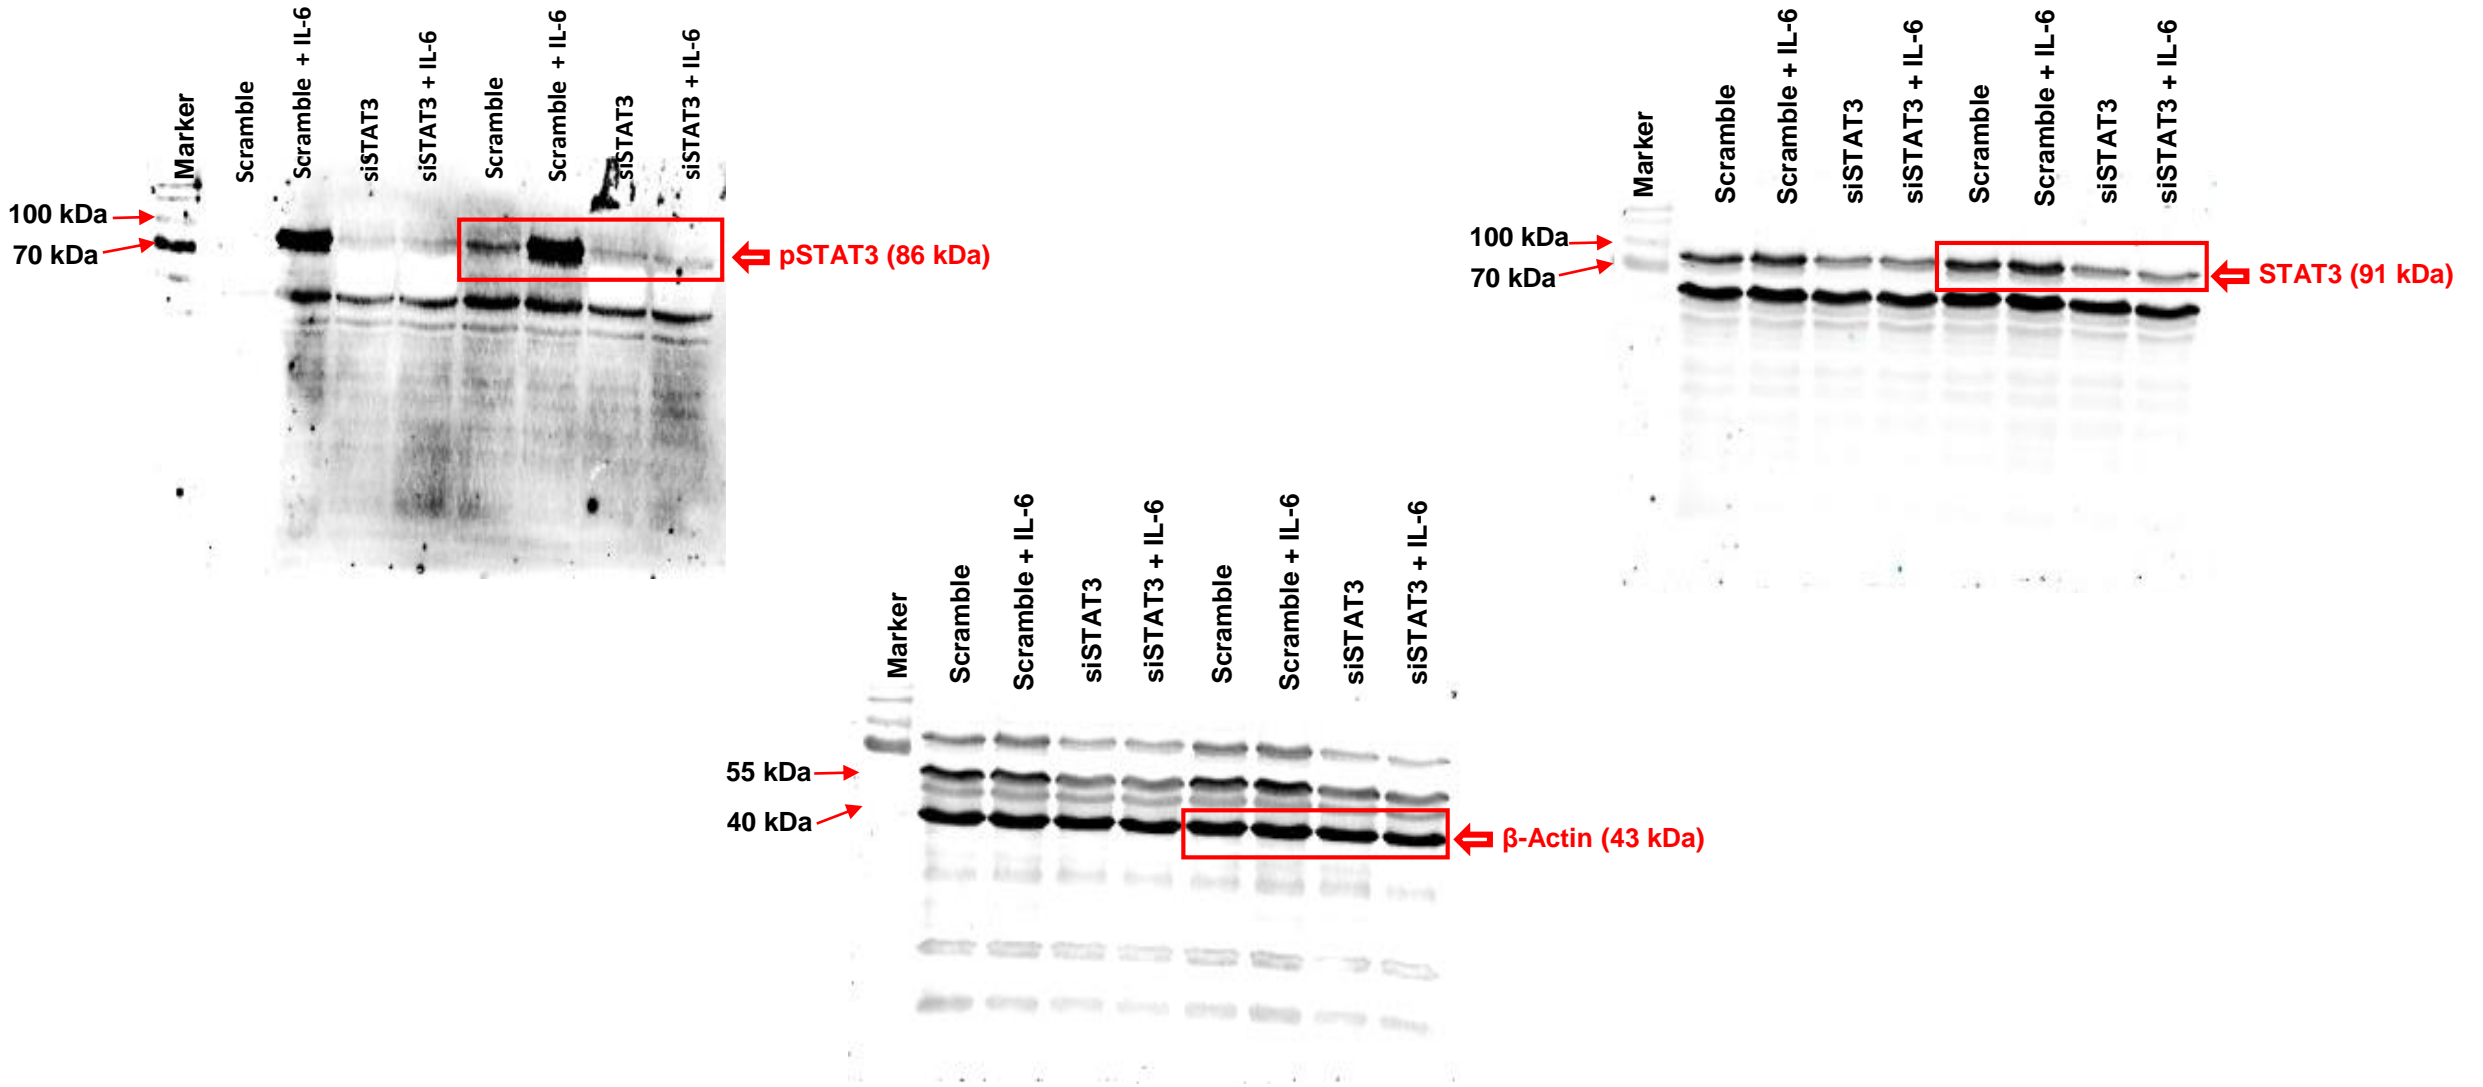

Uncut and unedited image of the blot used in Figure 5C

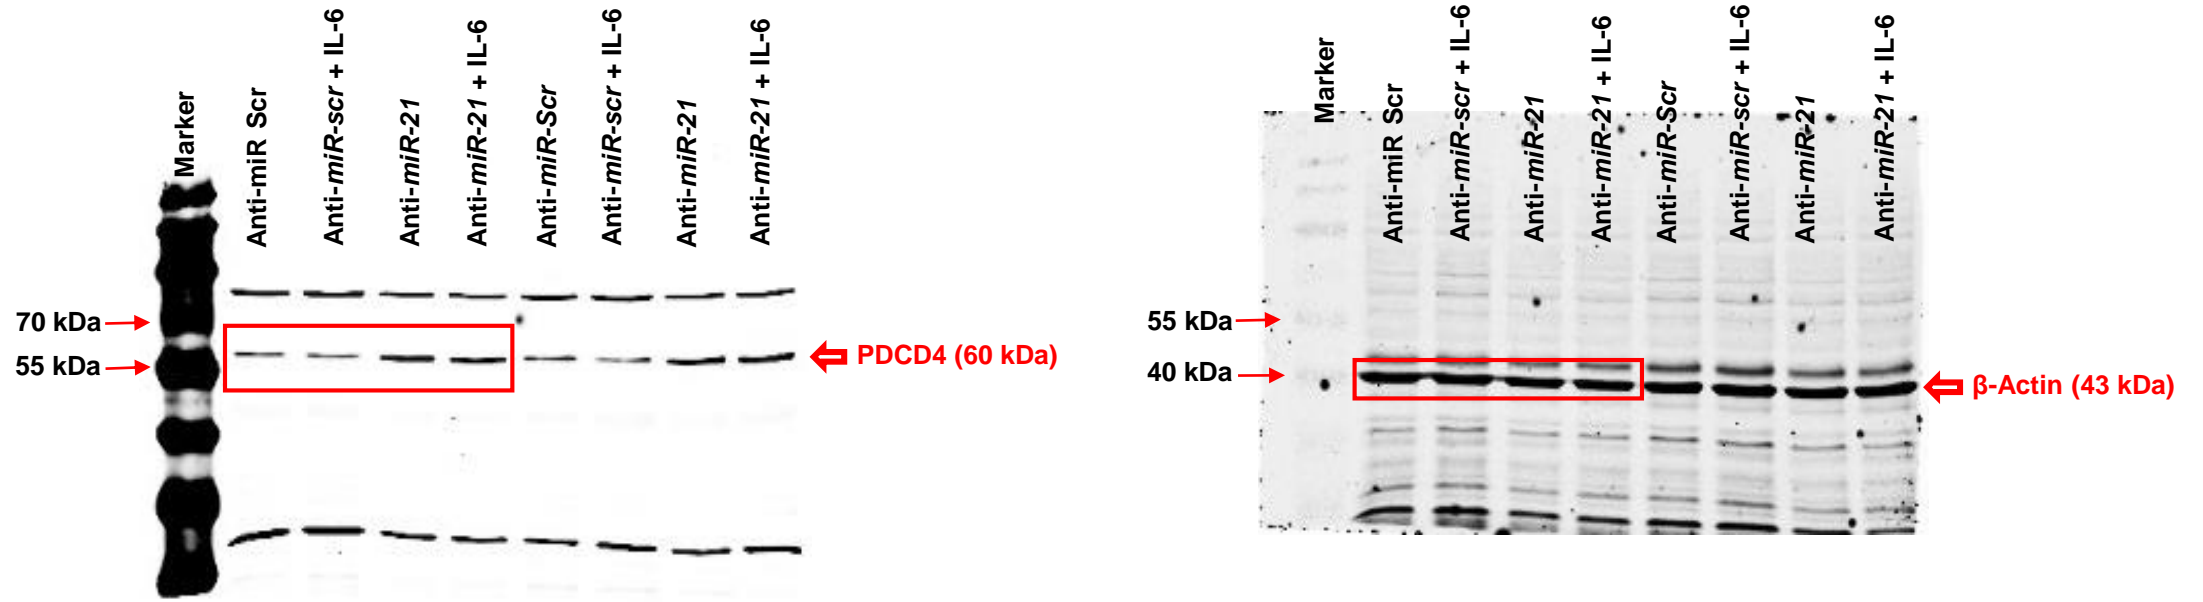

Uncut and unedited image of the blot used in Figure 5D

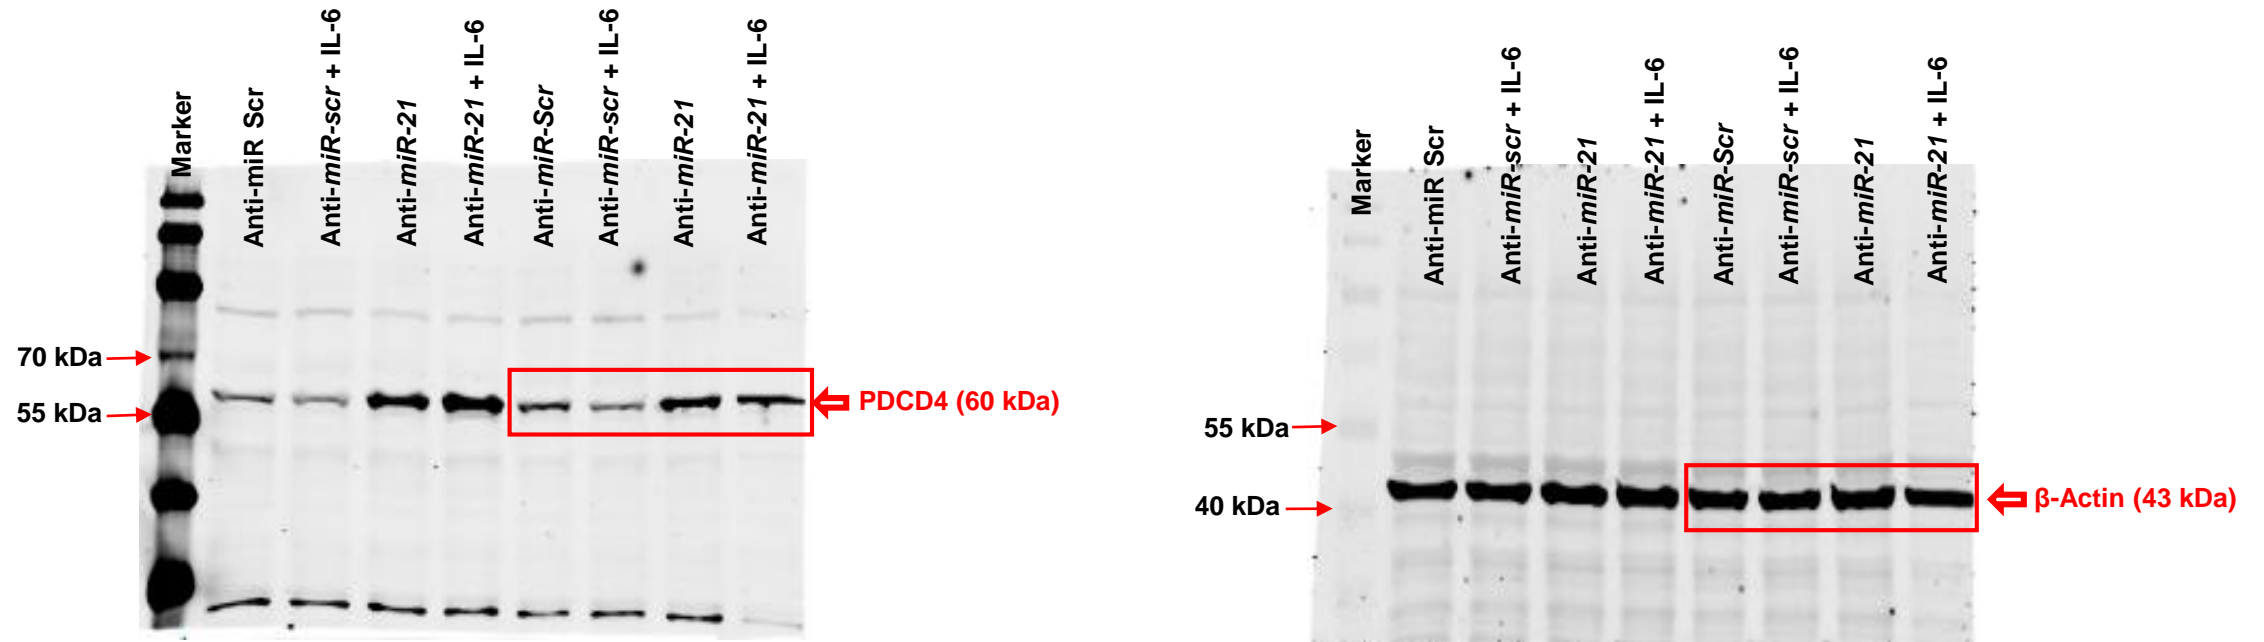

# Uncut and unedited image of the blot used in Figure 5E

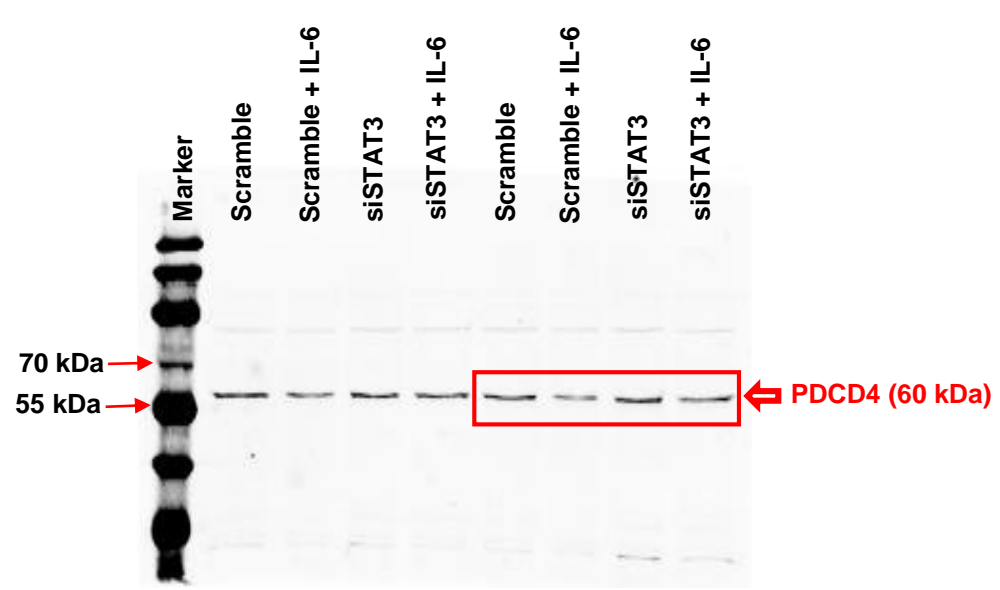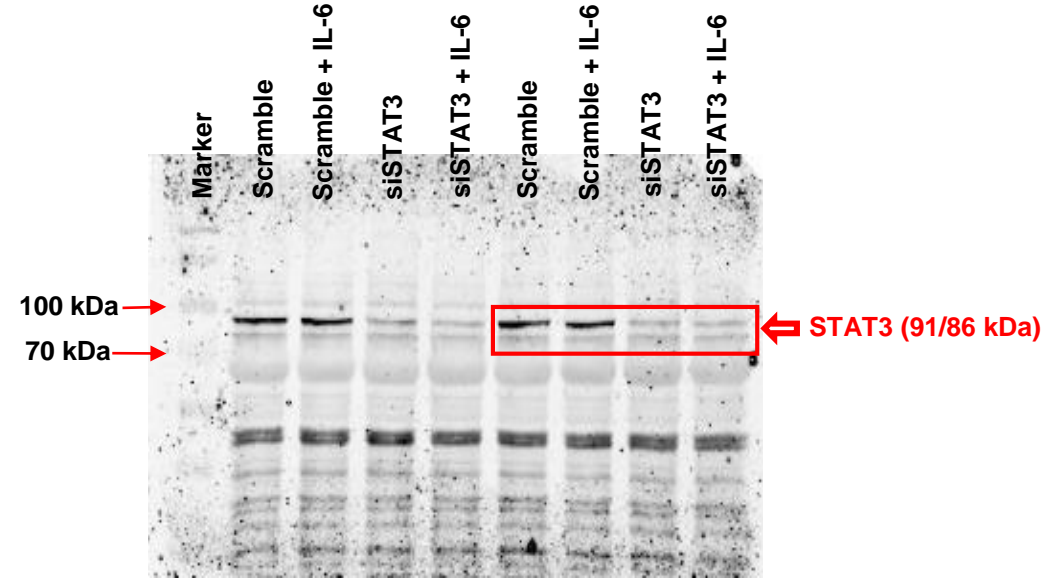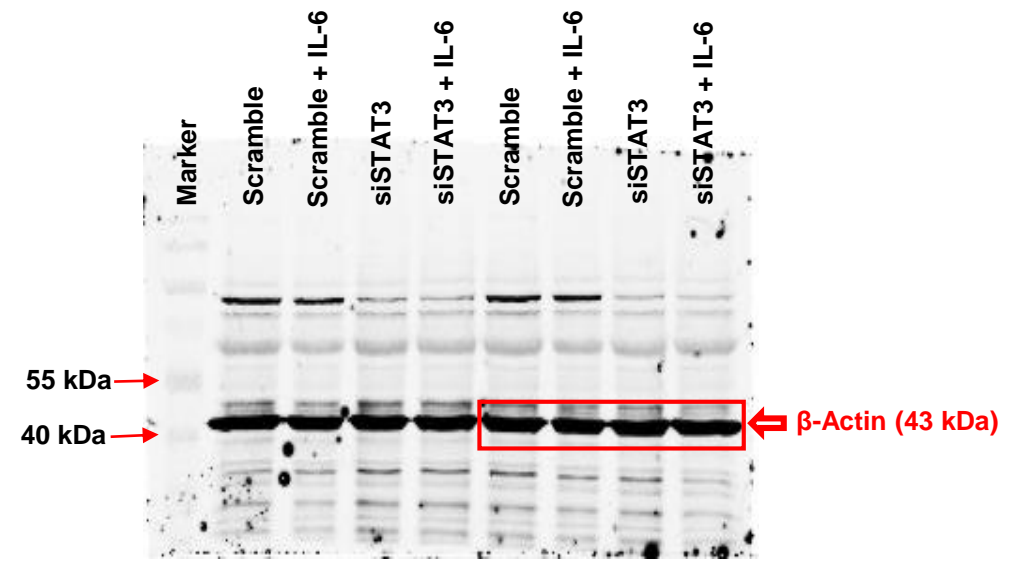

# Uncut and unedited image of the blot used in Figure 5F

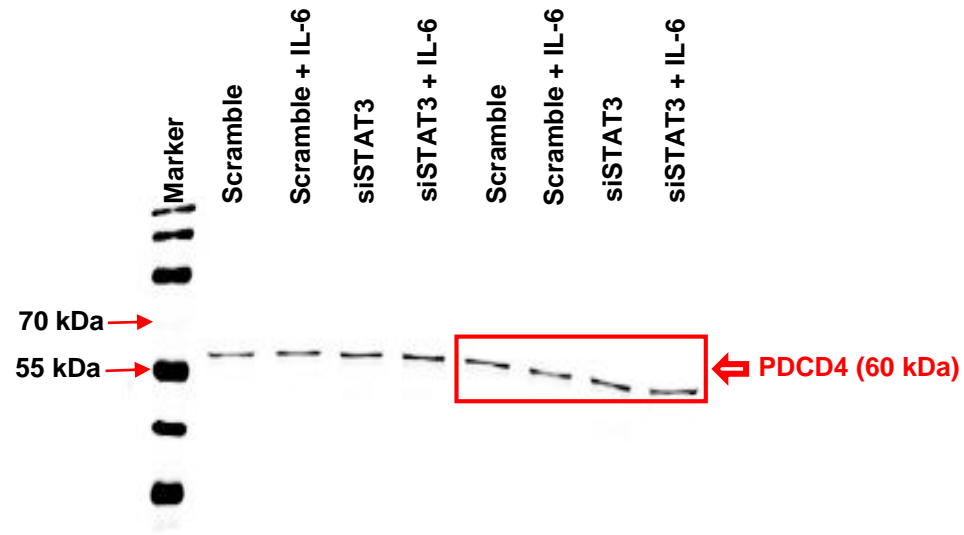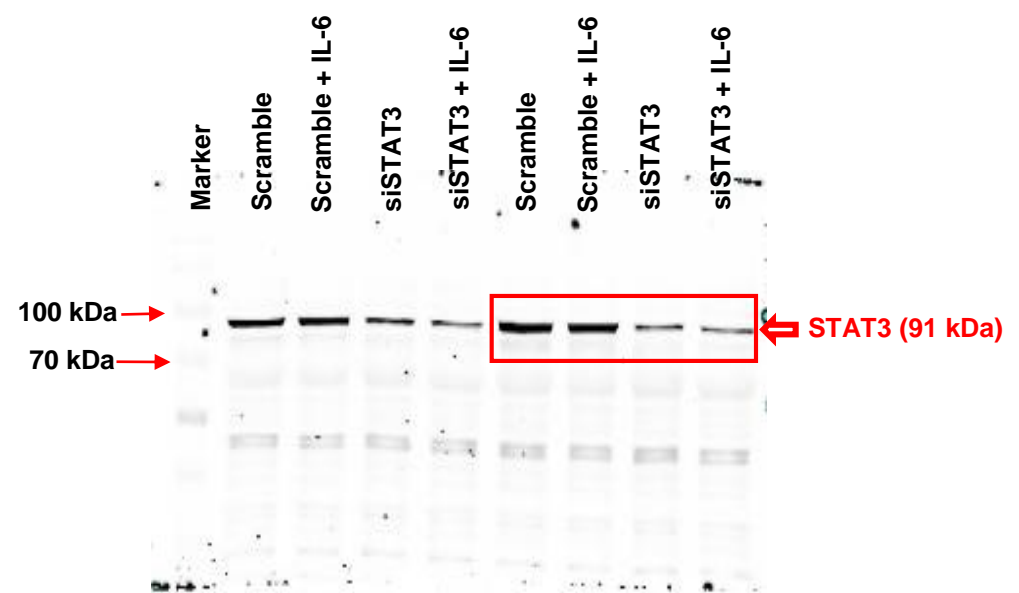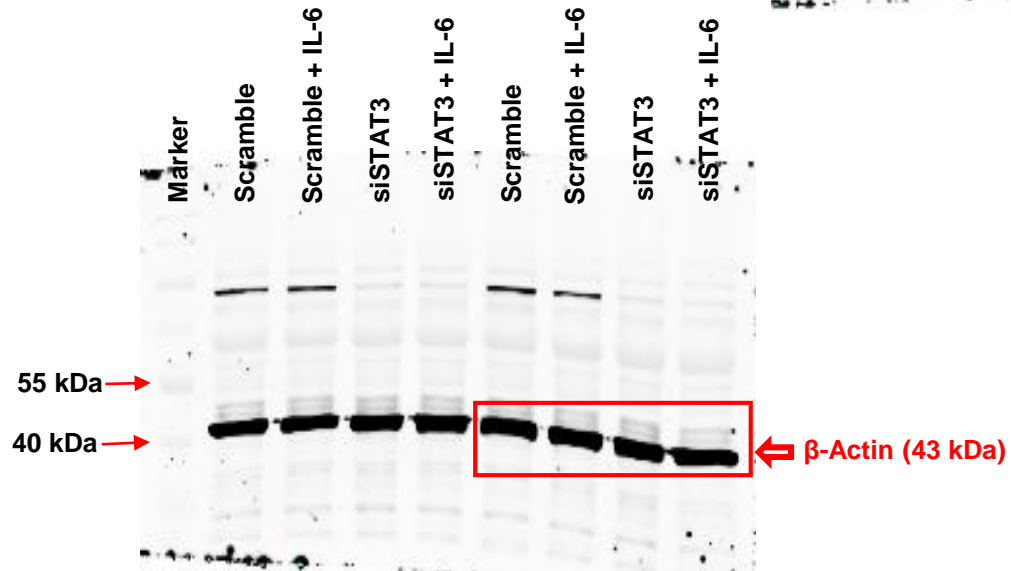

Uncut and unedited image of the blot used in Figure 6A

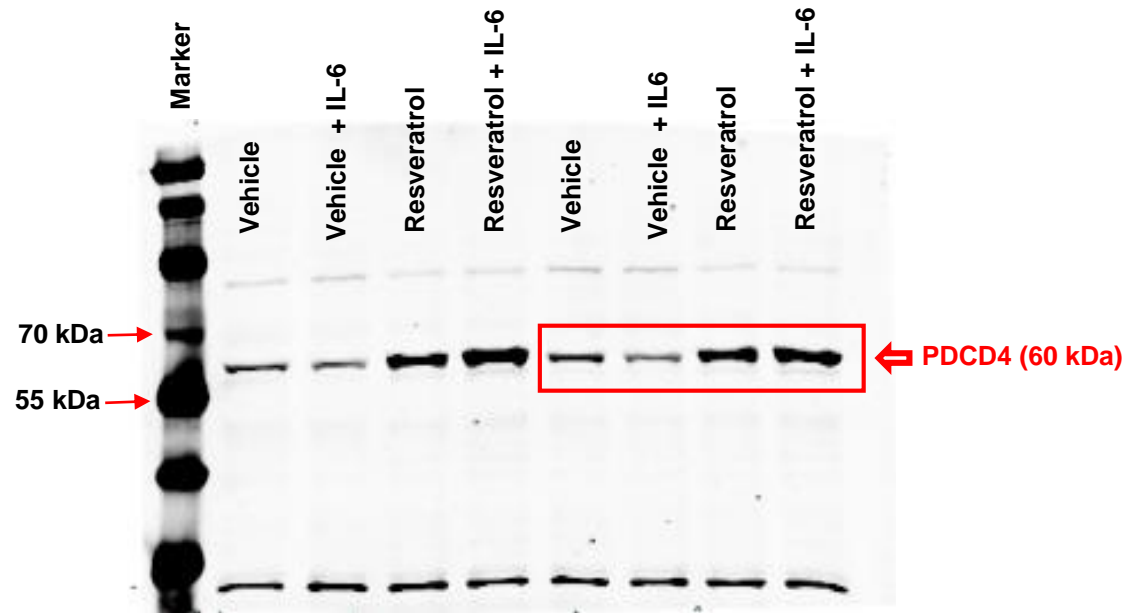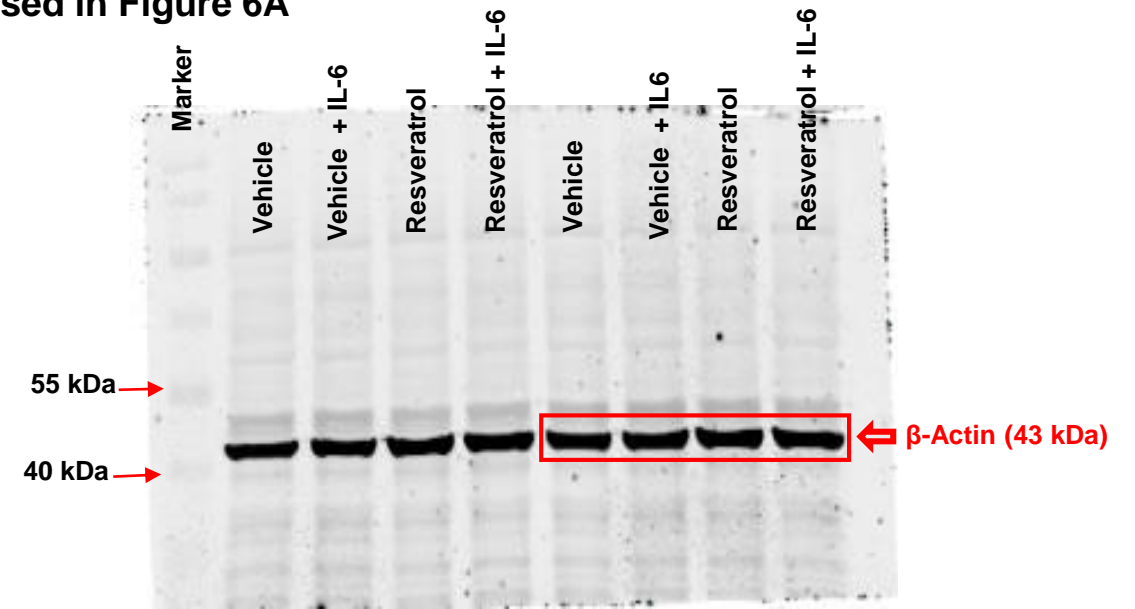

Uncut and unedited image of the blot used in Figure 6B

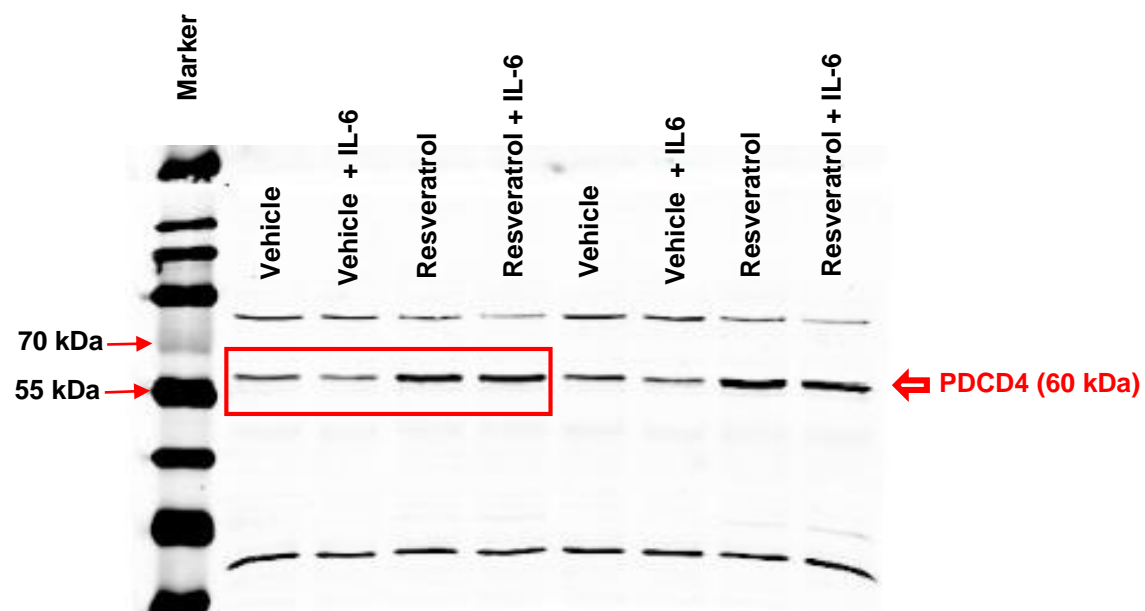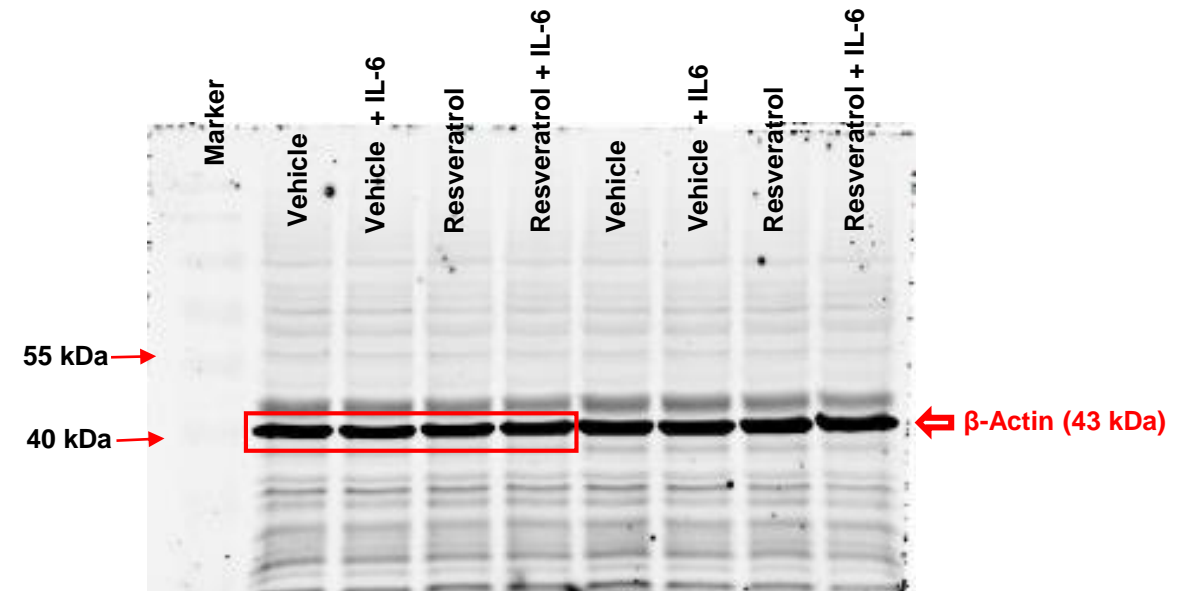

Supplement: pone.0177198.s001.pdf [file pone.0177198.s001.pdf]
